# Supplementary material
Source: PubMed Central journal article supplement (PMC7668093)
Supplement: pnas.2008479117.sapp.pdf [file pnas.2008479117.sapp.pdf]

## SUPPLEMENTARY METHODS

### *Cell Line Development and Maintenance*

BCaP cell lines were derived in the Ricke lab as previously described<sup>1</sup>. Briefly, a single cell taken from a benign human prostate, and was immortalized with T-antigen (BPH1 cell line). Xenografts using the BPH1 cell line and rodent urogenital mesenchyme were implanted under the kidney capsule of mice that were either untreated or treated with testosterone and estradiol. In untreated mice, the BPH1 xenograft did not form a tumor, and cells isolated from this xenograft are the BCaP<sup>NT1</sup> cell line. In mice that were treated, the BPH1 cells underwent malignant transformation, and cells were isolated from the resulting tumor at different time points. After 2 months, a small, non-metastatic tumor had formed (isolated cells became the BCaP<sup>T1</sup> cell line), and after 4 months a large metastatic tumor had formed (isolated cells from became the BCaP<sup>T10</sup> cell line, and isolated cells from metastasis site became the BCaP<sup>M1</sup> cell line). Finally, a BCaP<sup>T10</sup> xenograft was re-implanted a mouse that was not treated with testosterone and estradiol (castrate conditions); this tumor again metastasized, and cell isolated in the system because the BCaP<sup>MT10</sup> cell line<sup>2</sup>. LNCaP and derivatives were obtained from collaborators at UW-Madison, and Dr. Donald Vander Griend at the University of Illinois-Chicago generously provided LAPC4 and derivatives. BCaP and LNCaP cell lines were maintained in RPMI 1640+L-glutamine medium (Hyclone, Logan, UT) supplemented with 5% fetal bovine serum (FBS) (Hyclone), 2.5% HEPES (Hyclone), 1% penicillin/streptomycin (P/S) (Hyclone), and 0.2% Normacin (Invivogen, San Diego, CA). For low glucose experiments, RPMI 1640 without L-glutamine and phenol red was used as the base medium.

### *RNA Immunoprecipitation (RIP)*

Eight million cells were collected in 1 mL non-denaturing lysis buffer + HALT (Thermo, 87786) and split between control IgG and DDX3 pulldowns. Lysate protein quantification allowed normalization between cell lines, and each sample was brought to a total volume of 480  $\mu$ L. 60  $\mu$ L, or 1/8, of each sample was removed to use for normalization to mRNA input. Protein G Dynabeads (Thermo, 10004D) were bound to DDX3 or IgG control antibodies and incubated for 4 hours at 4 °C with 480  $\mu$ L of lysate. RNA from each sample, including the input samples, was isolated using Qiagen RNeasy Mini kit (Cat. No. 74104). cDNA was reversed transcribed from the isolated RNA for input, control, and DDX3 RIP samples as described above, and qPCR (quantitative-PCR) was used to determine mRNA binding targets including AR. qPCR was also run for positive controls CCNE1 and Rac1, and negative control  $\alpha$ -tubulin (**supplemental table 2**).

### *RIP Analysis*

All RIP analysis was performed based on the Sigma Imprint Analysis Calculations.  $\Delta$ Ct was calculated for both control (IgG) and experimental (DDX3) samples by subtracting the “input” values from the RIP Ct values. This calculation accounts for RNA sample preparation differences, and differential baseline expression of mRNA targets. The “input” was calculated using the formula:  $Ct[\text{input}] - \log_2[\text{input dilution factor}]$ , where the input dilution factor is 8. The result of subtracting the input Ct from the RIP Ct (for DDX3 and IgG) is the normalized RIP Ct values for each sample. Using the normalized RIP Ct values, we can calculate the  $\Delta\Delta$ Ct to normalize for non-specific background, which is

defined as:  $\Delta\Delta Ct = \Delta Ct \text{ DDX3 RIP} - \Delta Ct \text{ IgG RIP}$ . The fold enrichment of the mRNA target for each sample is calculated using the formula:  $\text{Fold enrichment} = 2^{-\Delta\Delta Ct}$ .

#### *Bioanalyzer RNA Visualization and Quantitative-PCR (qPCR)*

RNA samples collected from the RIP experiments were visualized and quantified using Agilent 2100 bioanalyzer. Input and DDX3 IP samples showed significant presence of RNA, as expected, whereas significant RNA species in the IgG control pull downs were not present. For qPCR, RNA was isolated using the Maxwell 16 LEV simplyRNA Purification kit (Promega, AS1270), and cDNA was made using iScript Reverse Transcription Supermix (BioRad, 1708841). qPCR for AR and PSA was performed using SSO Universal SYBR (BioRad, 1725271), and data is represented as  $\Delta\Delta CT$ , or relative normalized expression. Normalization was calculated in reference to two validated housekeeping genes, TBP and YWHAZ (all primers detailed in **supplemental table 2**), and relative expression was calculated as a fold change of expression compared to the control group.

#### *Cycloheximide Pulse Chase*

To determine the degradation rate of AR, cell line models were treated with cycloheximide and expression of AR was determined by Western blot densitometry using ImageJ at 0, 6, and 24 h post-CHX treatment. Poly-ubiquitin was used as a visual control to ensure the cycloheximide treatment is inhibiting translation. As previously described, because poly-ubiquitin binds proteins to mediate degradation, one would expect a decrease of overall polyubiquitinated proteins when translation is decreased<sup>3</sup>. Here, we see that treatment with cycloheximide decreases overall prevalence of

polyubiquitinated proteins, as expected.  $\alpha$ -tubulin was used as a loading control. AR protein expression fold change (FC) was determined relative to the 0 h time point.

### *Tissue Microarrays (TMA)*

Both TMAs were acquired from the Prostate Cancer Biorepository Network (PCBN). Dr. Johnathan Melamed collected the CRPC TMA samples at the NYU School of Medicine (IRB #8723). This TMA contains 56 hormone naïve and resistant cores, with the 4 cores per patient ( $n = 14$ ). Before quantification, tissue quality was assessed resulting in the exclusion of cores with extensive tissue loss or  $<100$  epithelial cells, resulting in final samples sizes of  $n = 7$  hormone naïve and  $n = 14$  hormone resistant. The LuCaP PDX TMA (PCBN 89A-D) was created at the University of Washington by Dr. Colm Morrissey and contains 41 PDXs (patient derived xenografts) with 9 cores per xenograft. These PDXs include CRPC subtypes AR+ ( $n = 5$ ), AR low/- (DNPC, ARLPC) ( $n = 3$ ), and NEPC ( $n = 4$ ). LuCaP35, 23.1, 73, 77, and 96CR represent AR+ CRPC<sup>4,5</sup>, LuCaP176, 173.2A, and 173.2B represent AR low/- CRPC (DNPC, ARLPC)<sup>6,7</sup>, and LuCaP93, 145.1, 145.2, and 173.1 represent NEPC<sup>8</sup>.

### *Antibodies and immunoblot assays*

All antibodies used in the study are detailed in **supplemental table 1**. Western blot (WB) analysis was performed as previously described<sup>9</sup>. Briefly, 30  $\mu$ g of protein was loaded in each well and primary antibodies including AR, AR D6F11, and DDX3 were detected using a chemiluminescent substrate with  $\alpha$ -tubulin used as a loading control.

### *Multiplexed Immunohistochemistry (IHC)*

Immunohistochemistry was performed according to Biocare Medical's protocol, as previously described<sup>10</sup>. For the TMAs, DDX3 was detected with DAB and AR C-terminal was detected with Impact Red, and counterstained with hematoxylin. Single stained slides were used to create a spectral library for the chromogens, and analysis was done using Vectra automatic image acquisition and InForm 1.4 software as previously described<sup>11</sup>. Briefly, a spectral library is created for each chromogen individually, allowing the optical separation of chromogens during analysis. The method has been validated and utilized in a number of publications<sup>10,12-15</sup>. Segmentation of cellular compartments was done using hematoxylin (nuclear stain) as a marker for nuclei, followed by image "training" in which the software creates an algorithm to identify nuclei in images outside the training set. Visual representations of accurate tissue and cell compartment segmentation are shown in **supplemental figure S1**. For multiplexed fluorescent IHC of MT10 and C42 xenografts, AR C-terminal was incubated overnight (ON) at 4 °C, followed by GαM-HRP and tyramide signal amplification (TSA) 647 (Thermo, B40958). After TSA, the tissue was decloaked for 5 min at 110 °C in citrate buffer and blocked in 2.5% normal horse serum (NHS). DDX3 and PABP1 were incubated for 1 hour at room temperature (RT), followed by secondary antibody DαR-488 for DDX3 and DαM-555 PABP1. Nuclei were counterstained using DAPI.

### *RNAscope*

RNAscope protocol was performed according to ACD Bio recommendations. Briefly, tissues were rehydrated with xylenes and ethanol, and antigen retrieval was performed in the Decloaker with 1X ACD target retrieval buffer. 100 μL of AR RNA probe was incubated at 40 °C for 2 hours. Sequential additions of AMP 1-6 buffers were added

according to ACD Bio's protocol, followed by DAB for 5 min. Nuclei were counterstained with hematoxylin. Staining was quantified using CellProfiler in ImageJ, as previously described<sup>16</sup>. Briefly, each cell is given a positivity score where "0" indicates <1 dot/10 cells, "1" indicates 1-3 dots/cell, "2" indicates 4-9 dots/cell, "3" indicates 10-15 dots/cell, and "4" indicates >15 dots/cell.

### *Immunofluorescence*

Cells were grown on coverslips for 24 hours, fixed with methanol, and permeabilized using 0.25% triton X-100 in phosphate buffered saline (PBS). Cells were blocked in NHS for 1 hour and incubated in primary antibodies overnight at 4 °C. Primary antibodies used were DDX3, PABP1, AR C-terminal, AR N-terminal, Ki67, and cCASP3 (**supplemental table 1**). Secondary antibodies DαR-488 and/or DαM-555 were incubated on the cells for 1 hour at RT. Nuclei were counterstained with DAPI and imaged using a fluorescent microscopy.

### *DDX3 Vector Overexpression*

Overexpression was achieved by transient transfection of a pcDNA-DDX3+YFP plasmid using TransIT-X2 (Mirus, MIR6000) reagent according to MirusBio protocol. Briefly, cells were grown in 6-well plates and transfected with 1 µg vector control or 1 µg pcDNA-DDX3+YFP for 12 hours. After transfection, cells were fixed, permeabilized, and stained for DDX3 and AR N-terminal as described above.

### *DDX3 Inhibition*

Genetic inhibition of DDX3 was achieved by transfection with siRNA targeting DDX3. SMARTpool ON-TARGETplus Human *DDX3X* siRNA (Dharmacon, L-006874-02-0005), with the associated siRNA non-targeting scramble control (Dharmacon, D-001810-10-05). Cells were transiently transfected using Mirus Bio TransIT X2 Dynamic Delivery System (Cat. No. MIR 6005) with either 25 nM siDDX3 or siSCBL control. DDX3 was inhibited pharmacologically using 2  $\mu$ M RK33 (Selleck Chem, S8246) diluted in DMSO for 48 hours.

### *MTT Assay*

Cells were plated in a 96-well plate at a seeding density of 4000 cells per well, and grown in full media for 24 hours. Cells were then treated one of the following treatments: DMSO control (48 hours), 10  $\mu$ M bicalutamide (Sigma-Aldrich B9061) or 1  $\mu$ M enzalutamide alone (24 hours), 2  $\mu$ M RK33 alone (48 hours), or 2  $\mu$ M RK33 for 48 hours, with bicalutamide/enzalutamide added after 24 hours. After treatment, cells were incubated in 20  $\mu$ L MTT diluted to 5 mg/mL in sterile PBS for 1-2 hours at 37 °C. When precipitate formed, the MTT reaction was quenched with 100  $\mu$ L DMSO, and absorbance was read at 550nm.

### *Kidney Capsule Xenografts*

MT10 and C42 cells were grown to 80% confluence under normal growth condition, and grafts were made with 350,000 cells plus rat tail collagen. The cells were xenografted into the kidney capsule of intact Nu/Nu male mice. In half of the mice, a 25 mg bicalutamide pellet, with cholesterol (CHO), was inserted subcutaneously after 2 weeks. Three days later, DMSO/RK33 injections began, creating four treatment groups: control

(CHO+DMSO), BICA only (BICA+DMSO), RK33 only (CHO+sRK33), and co-treatment (BICA+RK33) with n = 4-6. RK33 injections were given at 20 mg/mL in 0.6% DMSO six times over the course of 2 weeks, as previously described<sup>17,18</sup>. Three days after the last RK33 injection, the mice were euthanized by CO<sub>2</sub>, and the tumors were harvested.

### *Statistics*

Bar graphs represent the sample mean with error bars for the standard error of the mean. GraphPad/Prism™ version 7.05 (GraphPad Software, Inc., La Jolla, CA) was used for all statistical analysis with a Student's t-test for comparison of 2 samples, or a one-way ANOVA with Tukey's test for multi-comparison statistics. Significance is represented by \*  $P$ -value  $\leq 0.05$ , \*\*  $P$ -value  $\leq 0.01$ , \*\*\*  $P$ -value  $\leq 0.001$ , \*\*\*\*  $P$ -value  $\leq 0.0001$ .



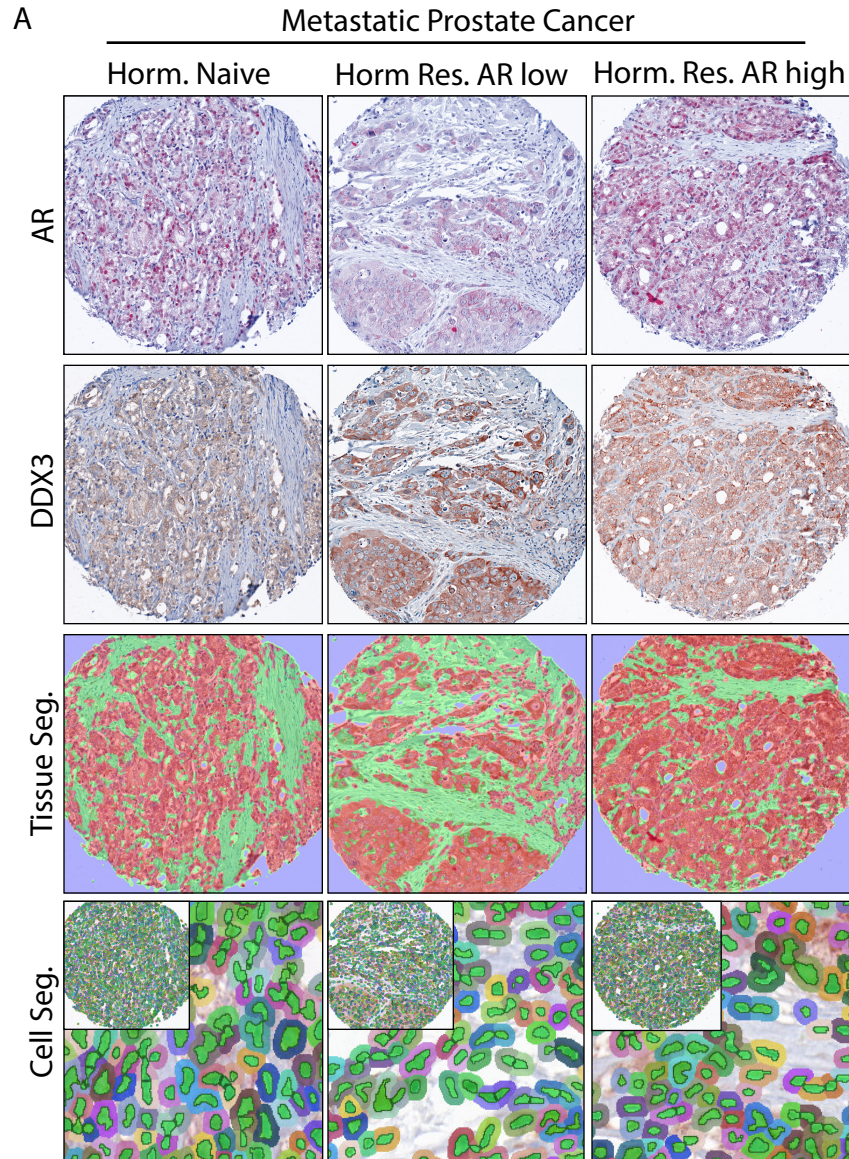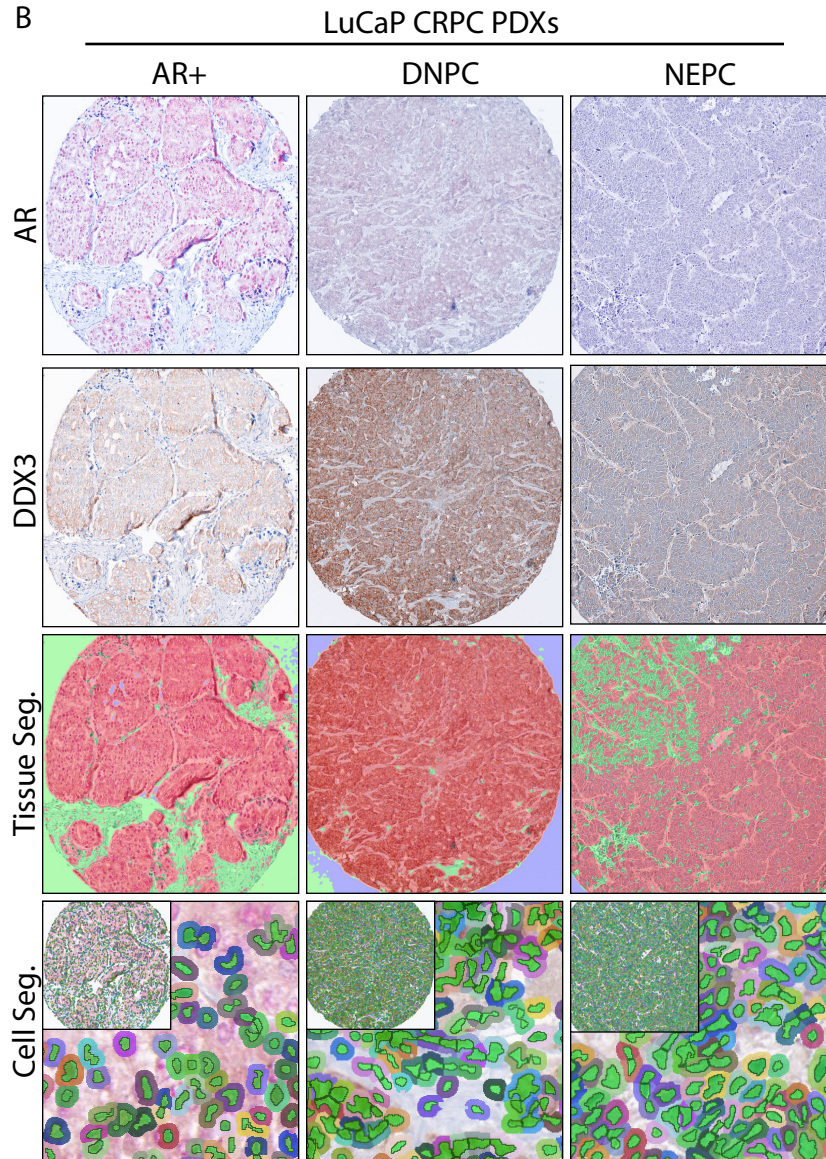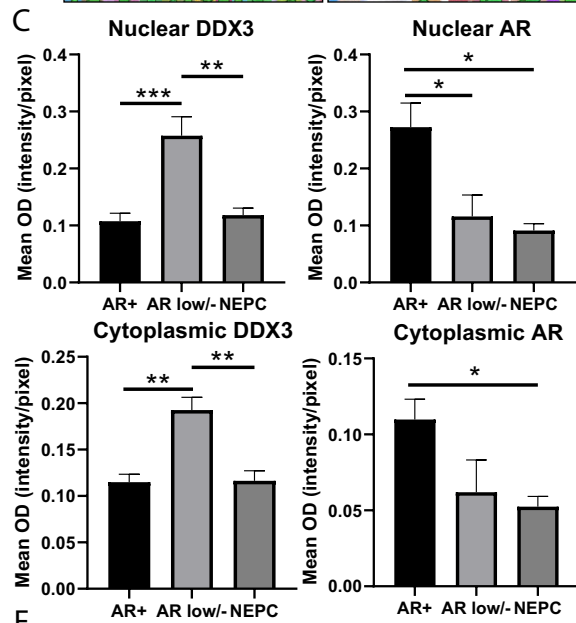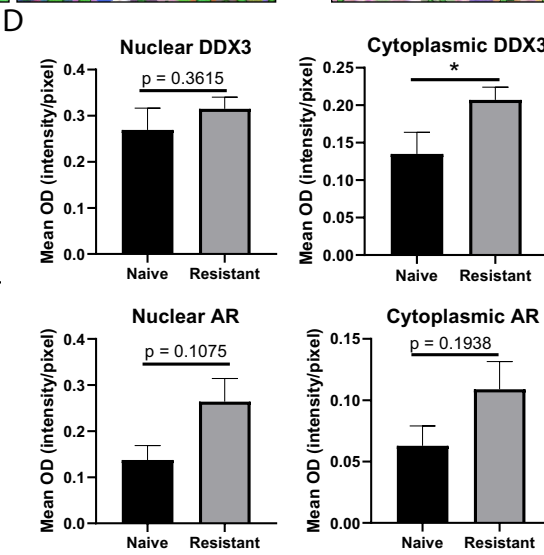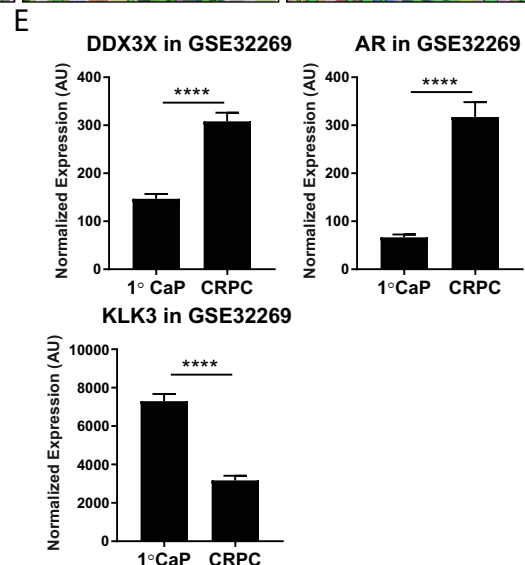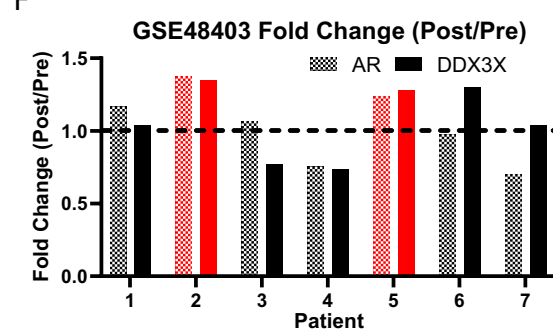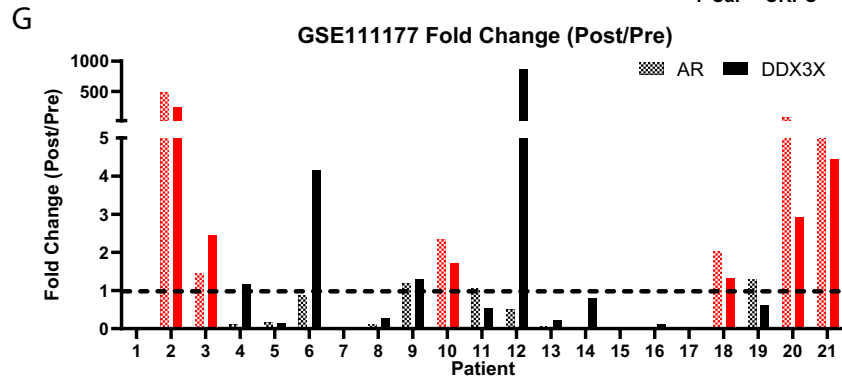

**Figure S1. InForm software tissue/cellular segmentation and meta-data. (A)**

Representative images of IHC co-staining for AR (red, first row) and DDX3 (brown, second row) in hormone naïve and hormone resistant (CRPC) specimens. Nuclei were counterstained with hematoxylin (blue). InForm software was trained to segment expression between the epithelial (red) and stromal (green) compartments (third row), and between nuclear (green) and cytoplasmic (multi-colored) cell segmentation (fourth row). **(B)** Representative images of IHC co-staining for AR (red, first row) and DDX3 (brown, second row) in LuCaP PDX samples containing AR+, ARL/- (DNPC, ARLPC), and NEPC subtypes. Nuclei were counterstained with hematoxylin (blue). InForm software was trained to segment expression between the epithelial (red) and stromal (green) compartments (third row), and between nuclear (green) and cytoplasmic (multi-colored) cell segmentation (fourth row). **(C)** Mean optical density of epithelial DDX3 and AR protein expression from the hormone-naïve/resistant samples.  $n = 7$  hormone-naïve,  $n = 14$  hormone-resistant. **(D)** Mean optical density of epithelial DDX3 and AR expression from LuCaP PDX samples.  $n = 5$  AR+ PDXs,  $n = 3$  ARL/- (DNPC, ARLPC) PDXs,  $n = 4$  NEPC PDXs. **(E)** Gene expression analysis of GSE32269 meta-data showed DDX3X and AR mRNA significantly increased in CRPC ( $n = 29$ ) compared to primary CaP ( $n = 22$ ) ( $P < 0.0001$ ), while KLK3 (PSA) significantly decreased ( $P < 0.0001$ ). **(F)** Gene expression analysis of GSE48403 showed concurrent increase of AR and DDX3 expressions in post-treatment vs. pre-treatment in two out of the seven patients (28.6%). **(G)** In GSE111177, concurrent increase of AR and DDX3 expressions in post-treatment vs. pre-treatment occurred in 6 out of the 21 patients (28.6%).

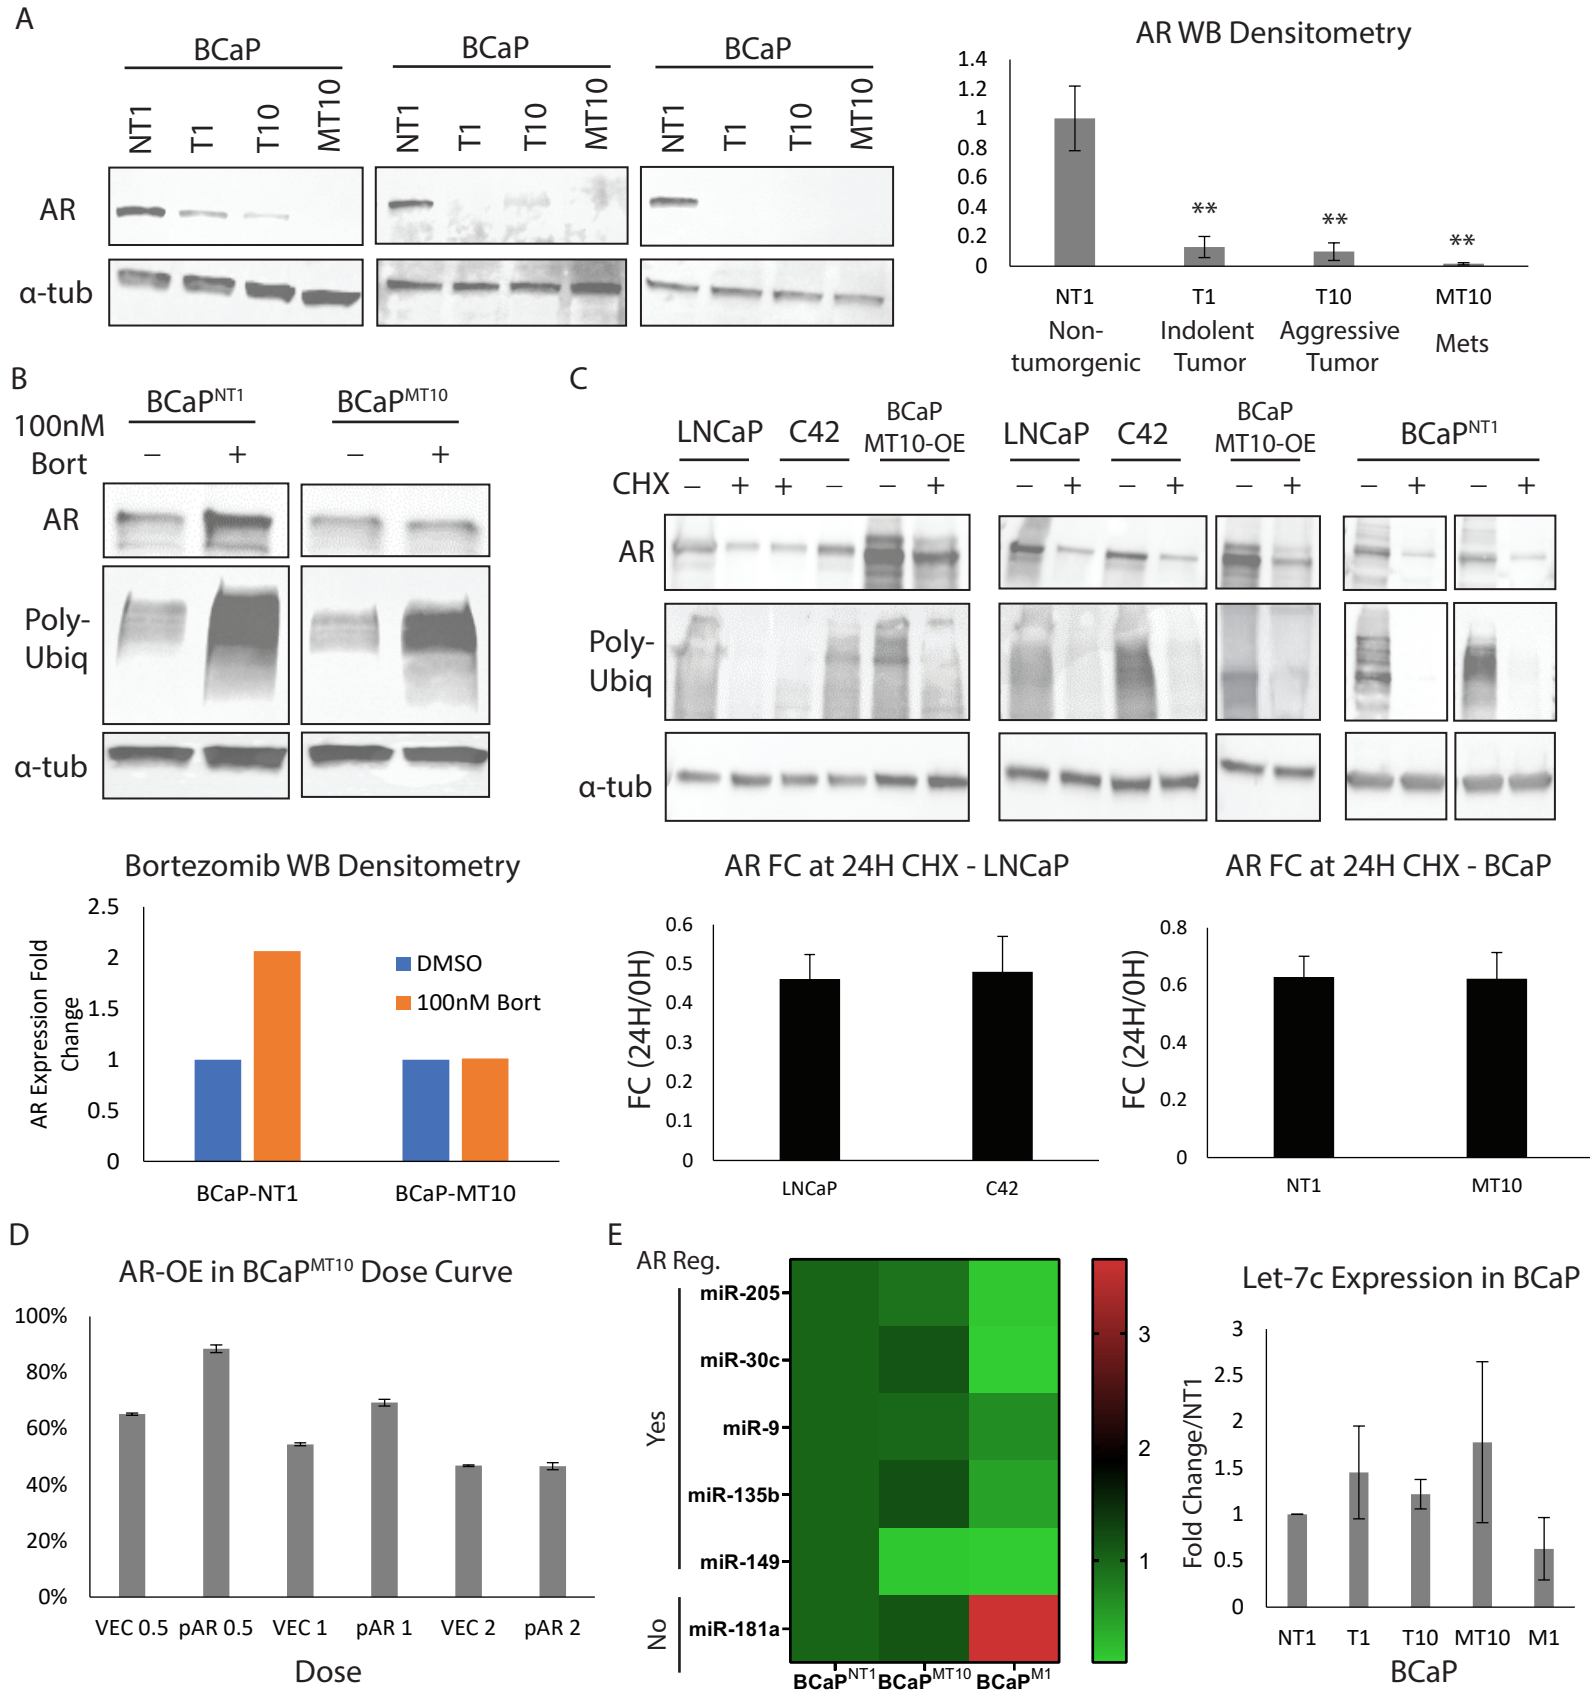

**Figure S2. Analysis of AR degradation and miR expression in CRPC models. (A)**

Western blot replicates for AR protein expression in BCaP cell line model, with  $\alpha$ -tubulin used as a loading control. **(B)** Western blot analysis of AR protein accumulation after inhibition of the 26S proteasome by treatment with bortezomib. In BCaP<sup>NT1</sup> AR protein accumulated, as expected, after treatment with bortezomib (AR blot exposure = 30 sec.). In BCaP<sup>MT10</sup> AR did not accumulate after treatment with bortezomib, suggesting increased rates of degradation were not contributing to the discrepancy between mRNA and protein expression of AR in this context (AR blot exposure = 300 sec.). Poly-ubiquitin (Ubiq.) was used as the positive control and  $\beta$ -actin was used as a loading control. Bar graphs represent quantification of Western blots by densitometry using ImageJ. **(C)** Western blot replicates for cycloheximide pulse-chase assays to assess AR protein degradation. Poly-ubiquitin was used as a visual control to ensure the cycloheximide treatment is inhibiting translation, and  $\alpha$ -tubulin used as a loading control **(D)** Cell viability/proliferation assessed by MTT assay after AR overexpression in MT10. Dose curve shows highest proliferation after transfection with 0.5  $\mu$ g/mL expression vector for AR. Empty vector represented as VEC, and AR-OE vector represented as pAR. Percent proliferation was calculated based on MT10 doubling time as assessed by MTT. **(E)** Heat map representing expression of a panel of microRNAs (miR) across BCaP progression showed no significant change in expression levels for miRs that have been identified as regulators of AR mRNA. miR-181a does not regulate AR, but has been shown to increase in BCaP progression, and was used here as a positive control. qPCR analysis showed miR *let-7c* expression was not significantly changed across progression in the BCaP model.

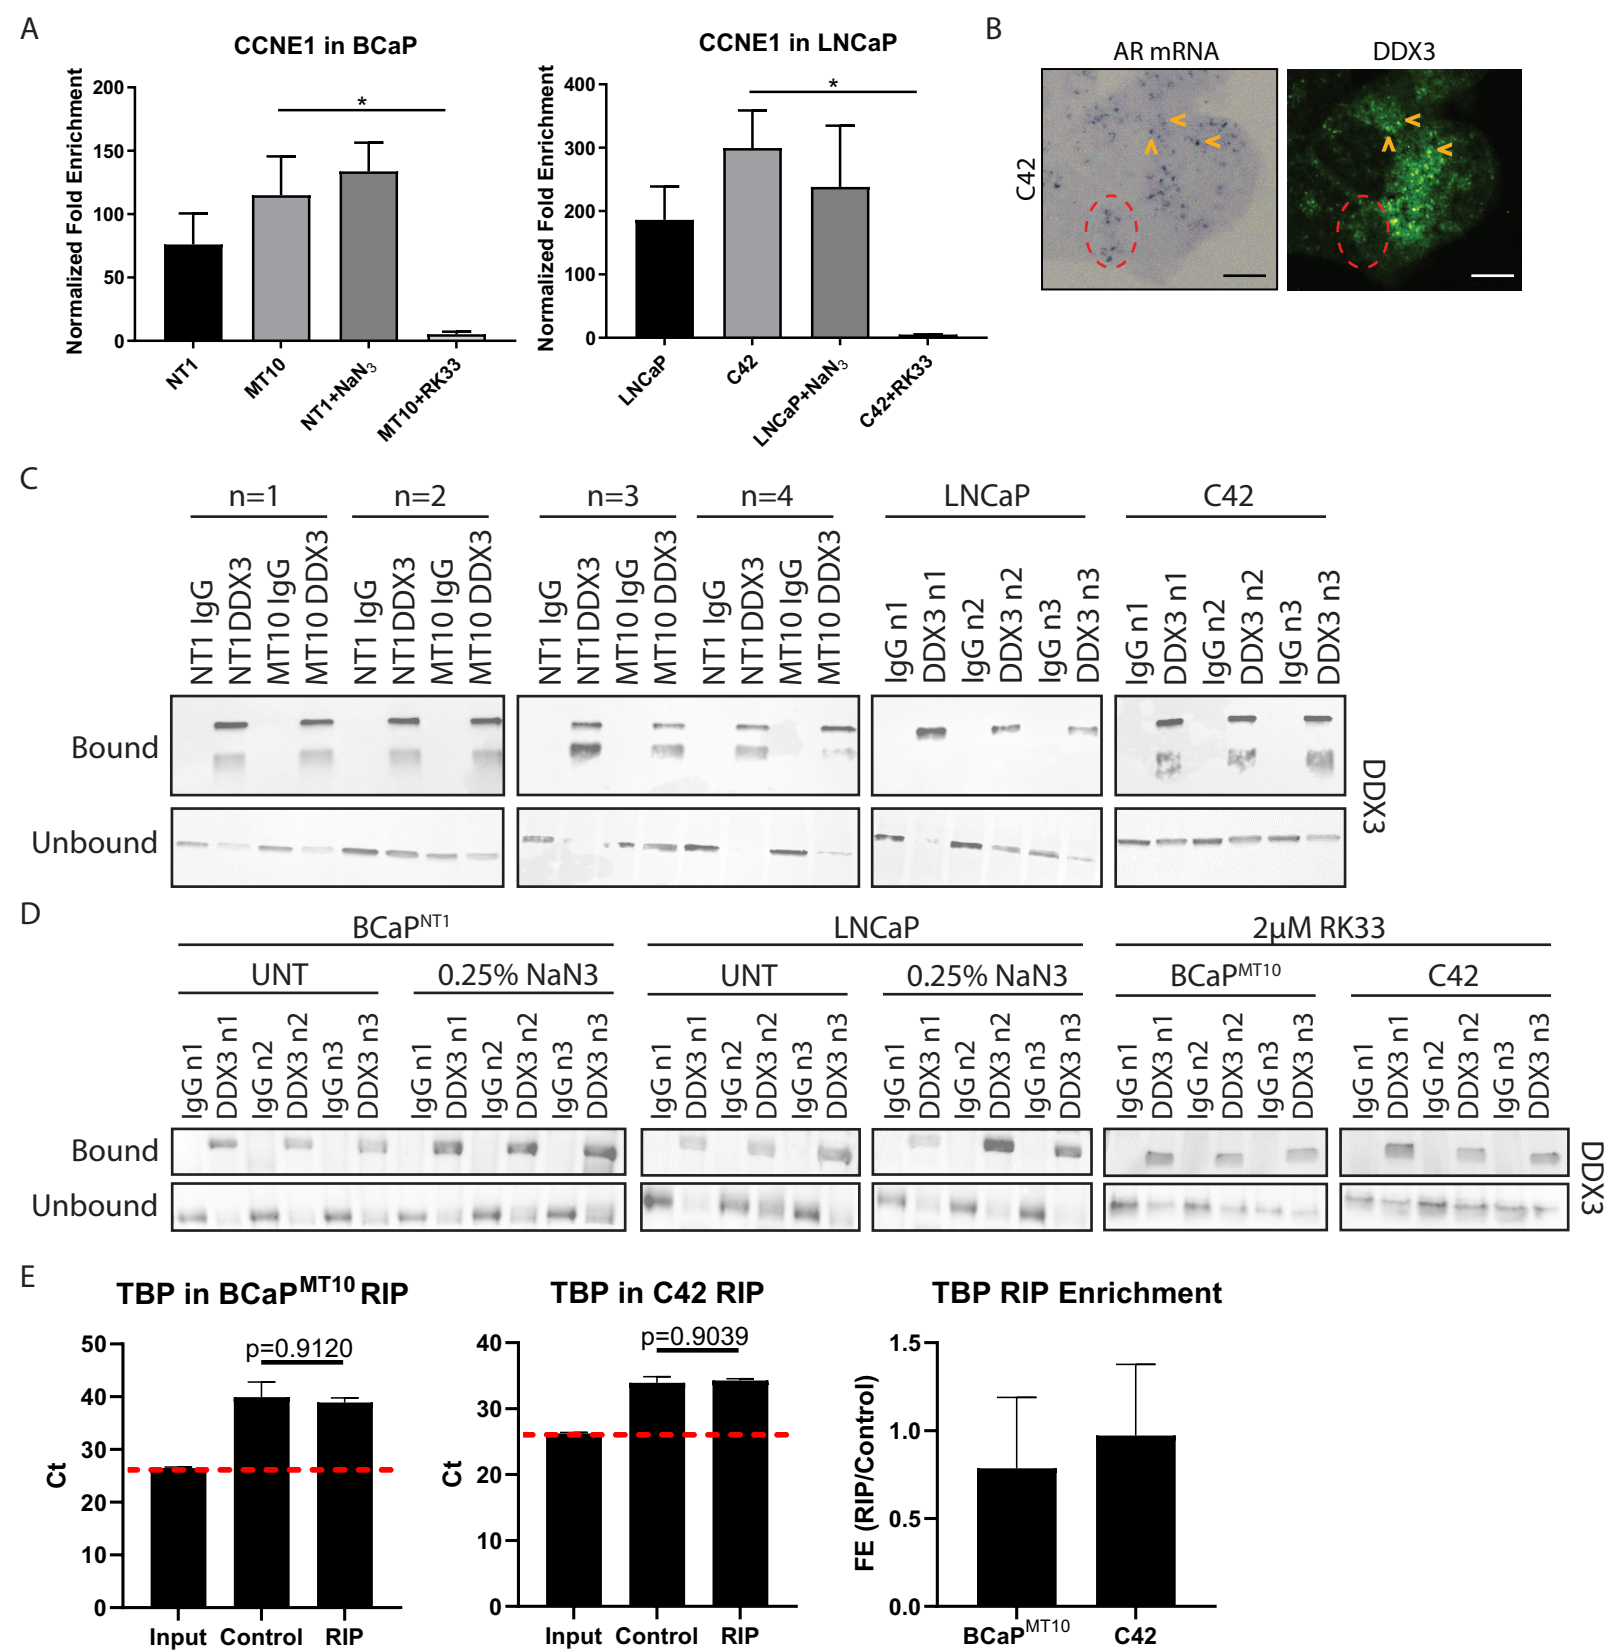

**Figure S3. Analysis of DDX3:AR mRNA complexes by RIP and ISH. (A)** RNA-immunoprecipitation (RIP) using DDX3 followed by qPCR for positive control CCNE1 showed binding of DDX3 to CCNE1 mRNA in all cell lines/conditions except with DDX3 inhibition by RK33. **(B)** *In situ* hybridization for AR mRNA (purple) followed by IF for DDX3 (green) demonstrated in some instances, AR mRNA co-localized with DDX3 protein in C42 (yellow arrows); however, steric hindrance from chromogenic amplification of DDX3 may have precluded the binding of the AR mRNA ISH oligos, resulting in an under-representation of co-localization in this assay (dashed red circle). Scale bar = 5  $\mu$ m. **(C)** Western blot controls for DDX3 RIP analyses in BCaP and LNCaP-C4 series (n = 3) after IP, as previously described. **(D)** Western blot controls for DDX3 in BCaP<sup>NT1</sup> and LNCaP with NaN<sub>3</sub> treatment (n = 3) after IP, and BCaP<sup>MT10</sup> and C42 with RK33 treatment (n = 3), as previously described. **(E)** QPCR for negative control Tata-binding protein (TBP) transcripts from DDX3-RIP pull downs in BCaP<sup>MT10</sup> and C42, where TBP is present in the input samples at a Ct value ~26, but not pulled down in either the IgG control or DDX3 RIP samples. The fold enrichment (FE) for TBP pull down in RIP/control is not significantly different from 1 (i.e. no enrichment) in both BCaP<sup>MT10</sup> and C42.

A

## C42 Xenograft

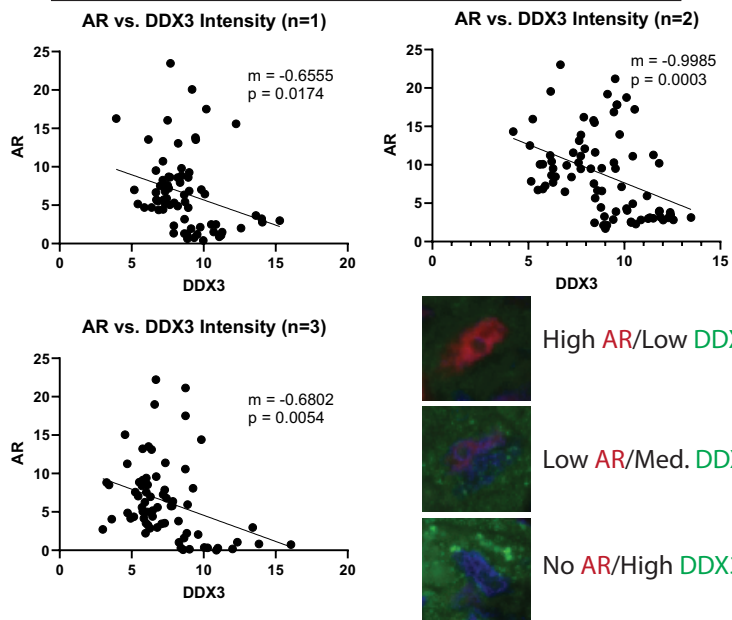

B

BCaP<sup>NT1</sup> XenograftBCaP<sup>MT10</sup> Xenograft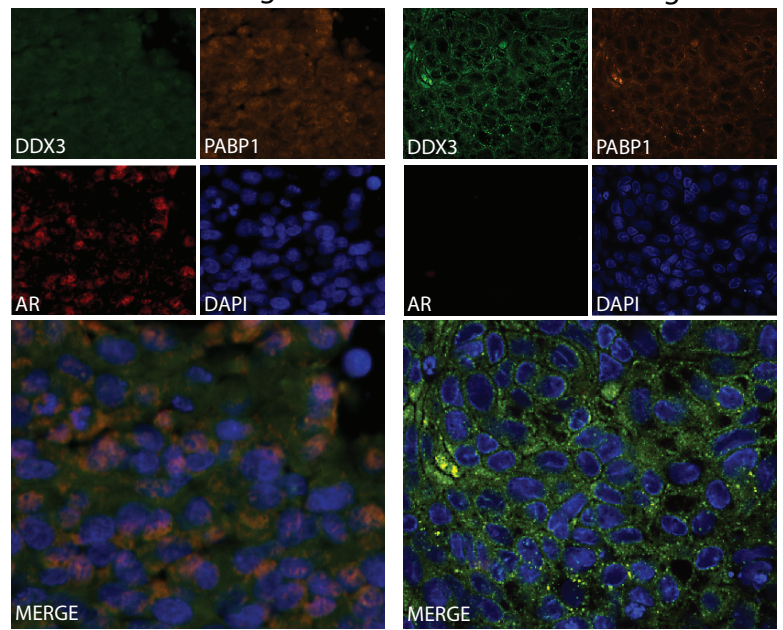

C

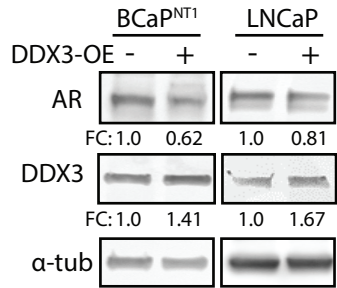

D

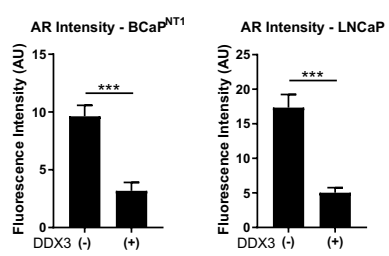

E

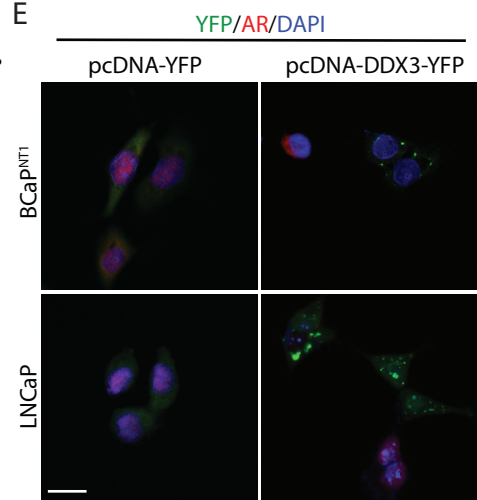

**Figure S4. DDX3 and AR protein expression and negatively associated in CRPC models.** **(A)** Linear regression for DDX3 and AR protein fluorescence intensity in C42 xenografts showed a significant negative correlation between DDX3 and AR expression (n=3). Representative images of single cells from this staining show the spectrum of AR (red) and DDX3 (green) expression levels within the tissue. **(B)** IHC of BCaP<sup>NT1</sup> and BCaP<sup>MT10</sup> xenografts grown *in vivo* where DDX3 is shown in green, PABP1 is shown in orange, and AR is shown in red. Nuclei were counterstained with DAPI (blue). **(C)** Western blot analysis of AR protein expression in a bulk population after DDX3 overexpression (DDX3-OE) showed a subtle decrease of overall AR protein (fold change, FC = 0.62 for BCaP<sup>NT1</sup>, and 0.81 for LNCaP) and increase of DDX3 protein (fold change, FC = 1.41 for BCaP<sup>NT1</sup>, and 1.67 for LNCaP). The transfection efficiency for BCaP<sup>NT1</sup> was around 35%, while the efficiency in LNCaP was only 15%; these low transfection efficiencies may contribute to the subtlety of the effect on AR expression in the bulk population. **(D)** At the single cell level, quantification of AR protein in cells that overexpressed DDX3 (DDX3 +) vs. control vector (DDX3 -) showed significantly decreased AR intensity (BCaP<sup>NT1</sup>  $P = 0.0001$ ; LNCaP  $P = 0.0004$ ). Fluorescence intensity was averaged between at least 3 separate experiments. **(E)** Representative images of DDX3 overexpression (green) showed cytoplasmic punctate localization that was inversely associated with AR staining (red) in parental cell lines BCaP<sup>NT1</sup> and LNCaP. Nuclei were counterstained with DAPI (blue).



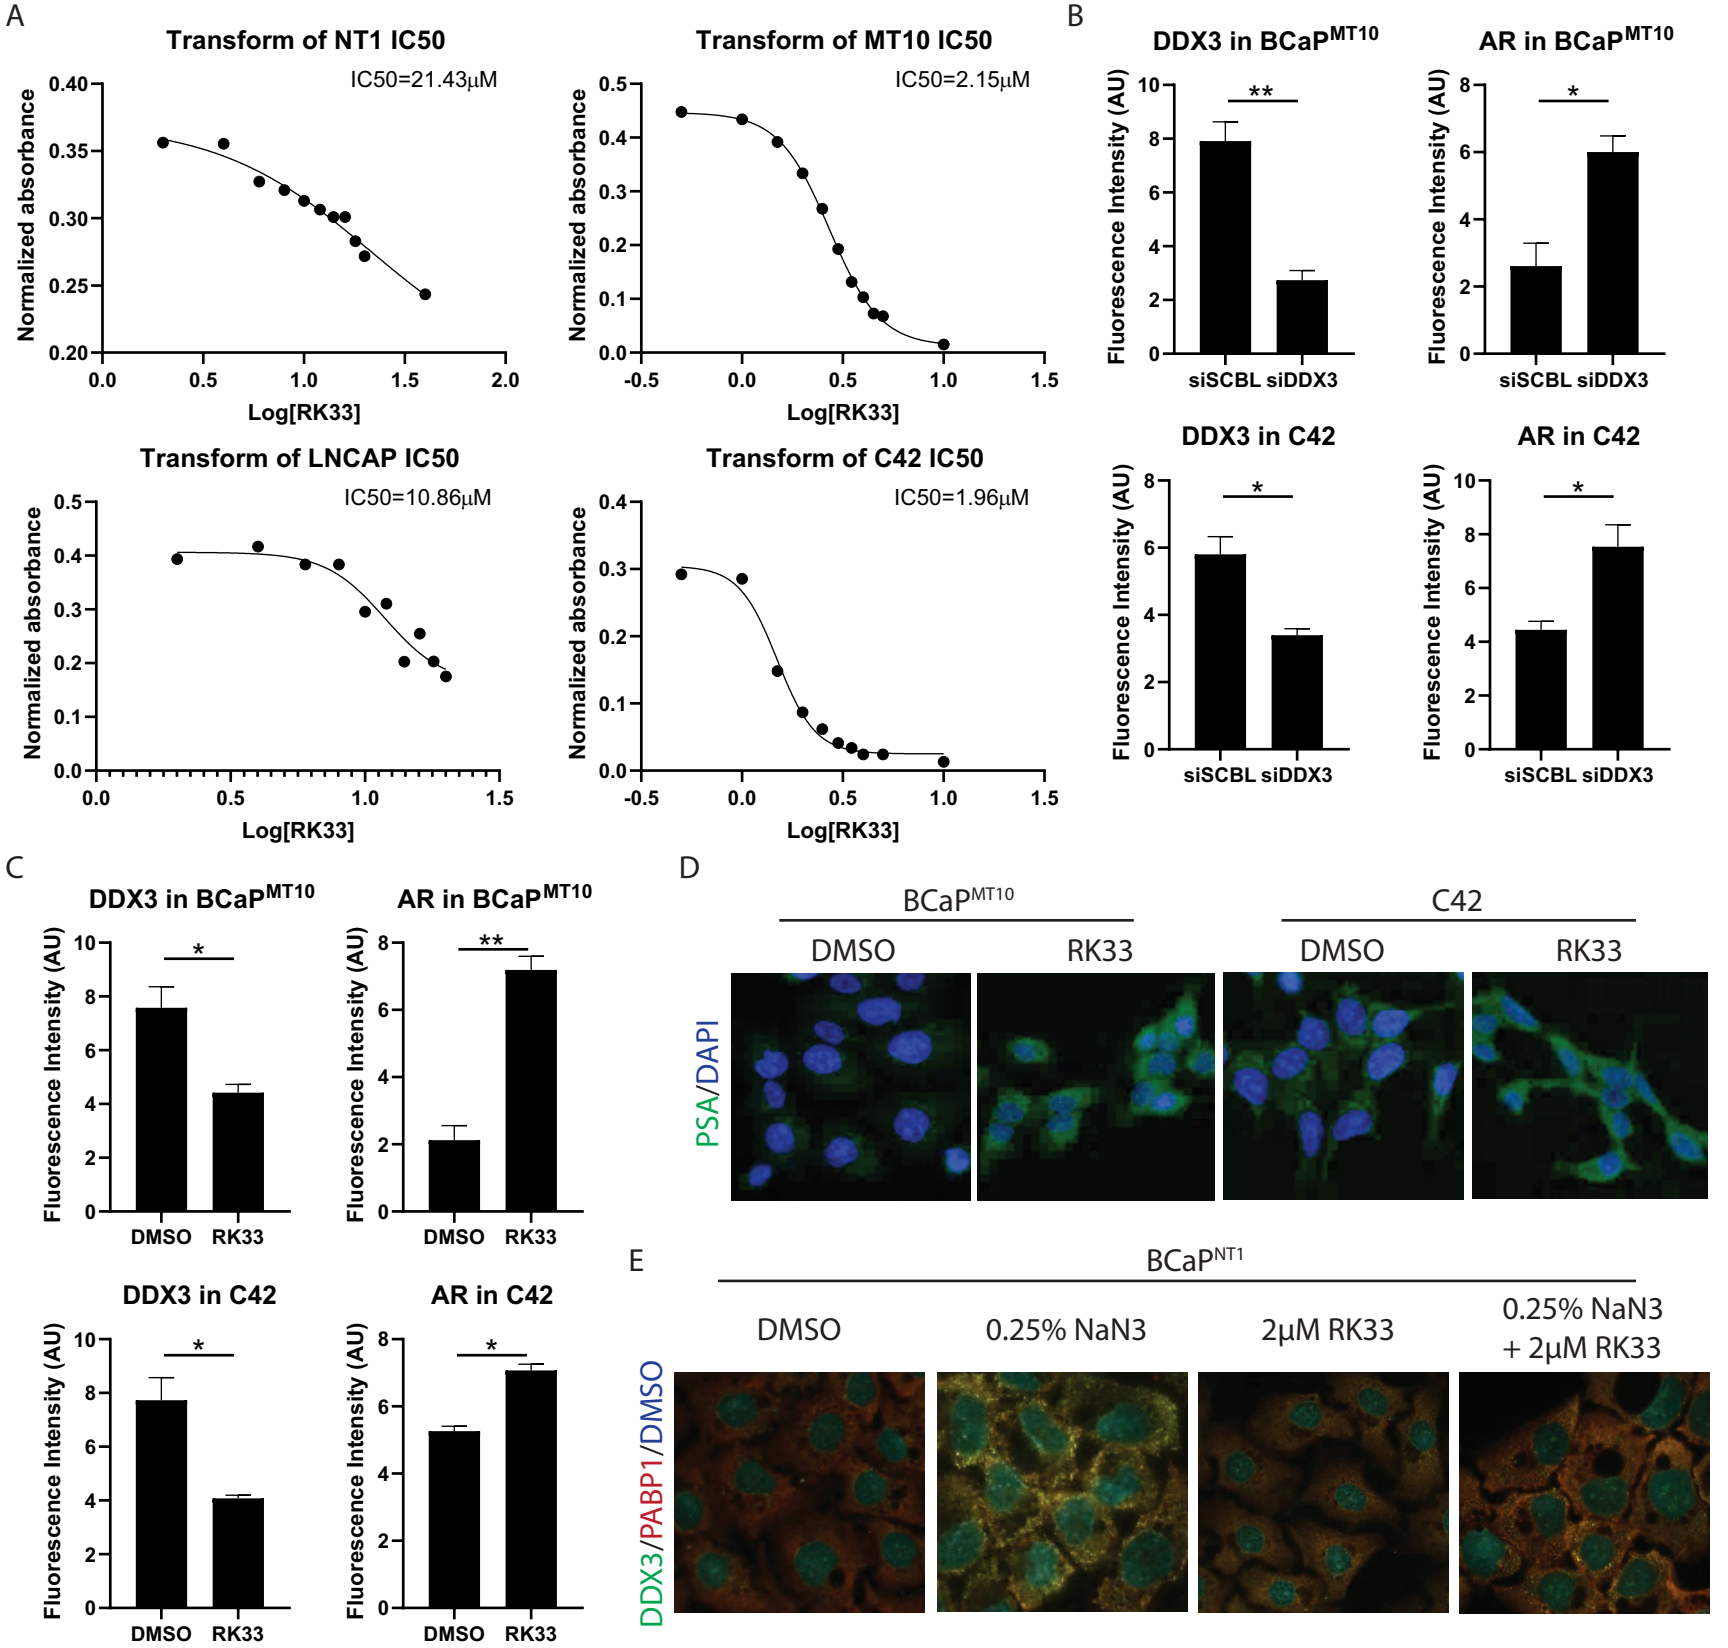

**Figure S5. DDX3 inhibition *in vitro* affects AR protein expression and signaling.**

**(A)** Dose curves for treatment with RK33 assessed by MTT assay, where the log of an increasing concentration of RK33 was plotted vs. normalized absorbance values from MTT, allowing the calculation of IC<sub>50</sub> values (BCaP<sup>NT1</sup> IC<sub>50</sub> = 21.43uM, BCaP<sup>MT10</sup> IC<sub>50</sub> = 2.15 μM, LNCaP IC<sub>50</sub> = 10.86 μM, and C42 IC<sub>50</sub> = 1.96 μM). **(B)** Quantification of fluorescence intensity of DDX3 and AR protein with DDX3 inhibition by siRNAs. Compared to scramble controls, siDDX3 was sufficient to significantly decrease DDX3 protein expression in BCaP<sup>MT10</sup> ( $P = 0.008$ ) and C42 ( $P = 0.032$ ), while AR protein expression was significantly increased with siDDX3 in both models (BCaP<sup>MT10</sup>  $P = 0.019$ ; C42  $P = 0.049$ ). **(C)** Quantification of fluorescence intensity of DDX3 and AR protein with DDX3 inhibition by treatment with RK33. Compared to DMSO controls, RK33 was sufficient to significantly decrease DDX3 protein expression in both models (BCaP<sup>MT10</sup>  $P = 0.043$ ; C42  $P = 0.047$ ), while AR protein expression was significantly increased with RK33 (BCaP<sup>MT10</sup>  $P = 0.001$ ; C42  $P = 0.002$ ). **(D)** Consistent with KLK3 (PSA) mRNA expression, PSA protein expression was significantly increased when DDX3 was inhibited with RK33. **(E)** Stress granules were induced using sodium azide, followed by inhibition of DDX3 with RK33. DDX3 (green) and PABP1 (red) localized to cytoplasmic puncta when treated with sodium azide alone. With RK33 treatment, DDX3 expression is decreased, and PABP1 expression remains high, but no longer localizes to cytoplasmic puncta, supporting the role of DDX3 as a SG-nucleating factor.

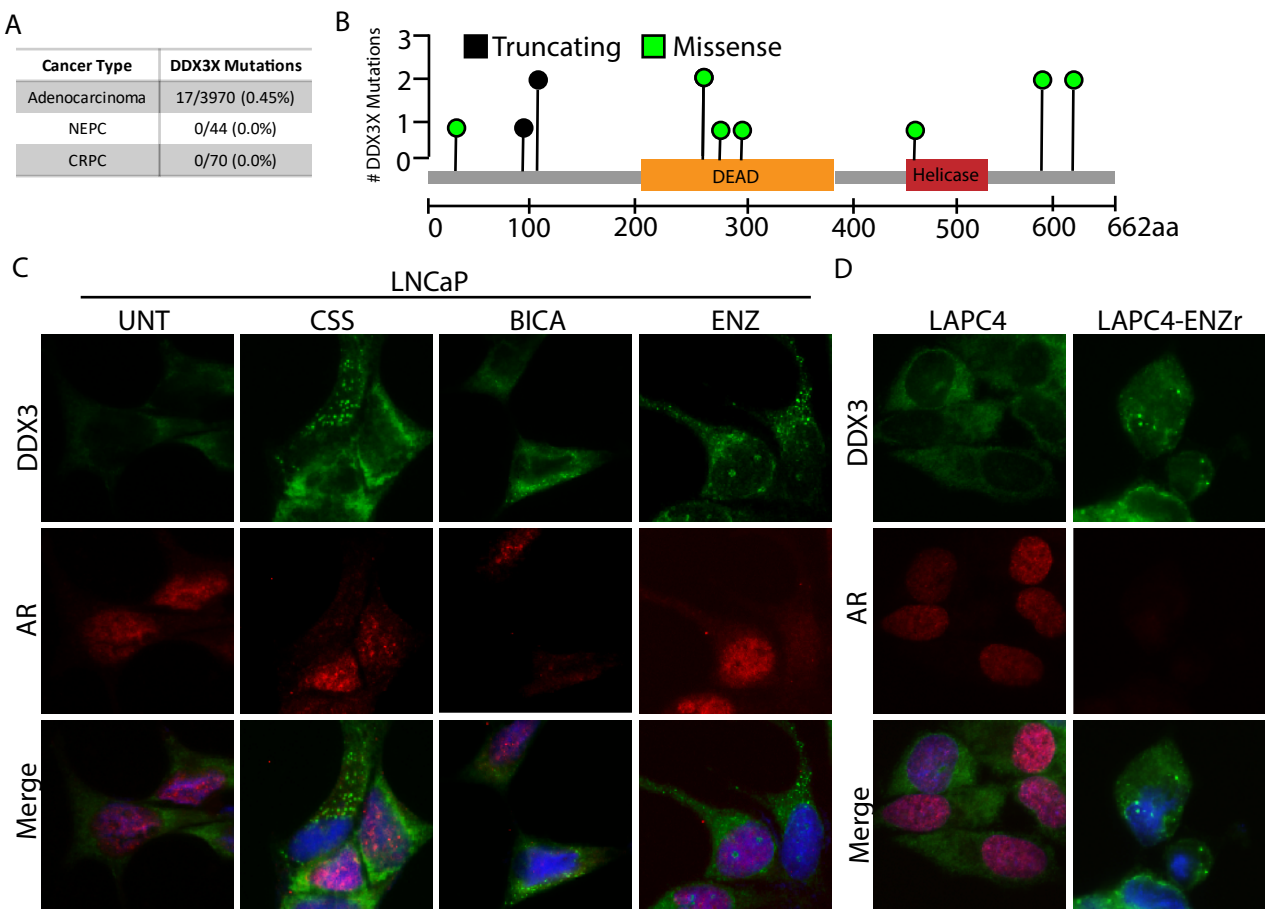

**Figure S6. DDX3 localizes to SGs in CRPC in low glucose and low androgen**

**conditions. (A)** Interrogation of TCGA cBio portal for mutations in DDX3X showed few mutations in across cancer types. Data was mined by selecting all “prostate” datasets available, selecting “mutation” inquiry, and entering DDX3X as the gene of interest. The mutation data was then segregated by cancer type using the “cancer type detailed” function. There were 17/3970 (0.45%) mutations in adenocarcinomas, 0/44 mutations in NEPC, and 0/70 mutations in CRPC. **(B)** A line plot shows the location within the DDX3X gene that the 17 mutations occurred, and how frequently this location was mutated. **(C)** DDX3 punctate localization (green) is inversely associated with AR protein expression (red) under a variety of conditions including low glucose and ARSI using two clinically relevant anti-androgens (BICA and ENZ). Nuclei were counterstained with DAPI (blue). **(D)** Enzalutamide-resistant LAPC4 cells (LAPC4-ENZr) were derived from the parental line (LAPC4) by constitutive growth in media containing enzalutamide for 6 months, see supplemental methods<sup>19</sup>. These therapy resistant cells show an overall decrease in AR protein (red), and an increase in DDX3 localization to cytoplasmic puncta (green). Nuclei were counterstained with DAPI (blue).

Supplemental Table 1. Commercially available antibody specifics

| <b>Antibody</b>                              | <b>Source</b>       | <b>Cat. #</b> | <b>Dilution</b>             | <b>Notation</b>  |
|----------------------------------------------|---------------------|---------------|-----------------------------|------------------|
| <b>DDX3</b>                                  | Bethyl Laboratories | A300-474A     | IHC/IF/RIP 1:250, WB 1:2000 | DDX3             |
| <b>AR</b>                                    | Bethyl Laboratories | A303-965A     | WB 1:1000                   | AR               |
| <b>AR</b>                                    | Cell Signaling      | 5153          | WB 1:1000                   | AR D6F11         |
| <b>AR</b>                                    | Abcam               | 227678        | IHC/IF 1:200, WB 1:1000     | AR C-terminal    |
| <b>AR</b>                                    | Santa Cruz          | 7305          | IF 1:100                    | AR N-terminal    |
| <b>PABP1</b>                                 | Novus Biologicals   | 120-6125      | IHC/IF 1:250, WB 1:1000     | PABP1            |
| <b><math>\alpha</math>-tubulin</b>           | Cell Signaling      | 2144          | WB 1:1000                   | $\alpha$ -tub    |
| <b>Ki67</b>                                  | Abcam               | 15580         | IHC/IF 1:250                | Ki67             |
| <b>cCASP3</b>                                | Cell Signaling      | 9579          | IHC/IF 1:250                | cCASP3           |
| <b>Purified Rabbit IgG</b>                   | Bethyl Laboratories | P120-101      | RIP 1:250 (1X)              | IgG              |
| <b>Donkey <math>\alpha</math> rabbit 488</b> | Thermo Scientific   | A21206        | IHC/IF 1:250                | D $\alpha$ R-488 |
| <b>Donkey <math>\alpha</math> mouse 555</b>  | Thermo Scientific   | A31570        | IHC/IF 1:250                | D $\alpha$ M-555 |
| <b>Goat <math>\alpha</math> Rabbit HRP</b>   | Bethyl Laboratories | A120-201P     | WB 1:5000                   | G $\alpha$ R-HRP |
| <b>Goat <math>\alpha</math> Mouse HRP</b>    | Bethyl Laboratories | A90-516P      | WB 1:5000                   | G $\alpha$ M-HRP |

Supplemental Table 2. Primers for quantitative PCR analysis

| <b>Gene</b>  | <b>Size</b> | <b>Primer</b> | <b>Sequence (5'-3')</b> | <b>Length</b> | <b>TM</b> | <b>Location</b> |
|--------------|-------------|---------------|-------------------------|---------------|-----------|-----------------|
| <b>AR #1</b> | 226         | Forward       | CCAGGGACCATGTTTTGCC     | 19            | 61        | 1628-1646       |
|              |             | Reverse       | CGAAGACGACAAGATGGACAA   | 21            | 60        | 1853-1833       |
| <b>AR #2</b> | 125         | Forward       | CAGCCTATTGCGAGAGAGCTG   | 21            | 60.87     | 3313-3333       |
|              |             | Reverse       | GAAAGGATCTTGGGCACTTGC   | 21            | 59.8      | 3437-3417       |
| <b>CCNE1</b> | 104         | Forward       | GCCAGCCTTGGGACAATAATG   | 21            | 61.3      | 176-196         |
|              |             | Reverse       | CTTGACGTTGAGTTGGGT      | 20            | 61.1      | 279-260         |
| <b>PSA</b>   | 250         | Forward       | TCATCCTGTCTCGGATTGTG    | 20            | 57.03     | 100-119         |
|              |             | Reverse       | ATATCGTAGAGCGGGTGTGG    | 20            | 59.04     | 349-330         |
| <b>YWHAZ</b> | 74          | Forward       | TGATCCCCAATGCTTCACAAG   | 21            | 60.3      | 314-334         |
|              |             | Reverse       | GCCAAGGTAACGGTAGTAATCT  | 22            | 60.2      | 389-367         |
| <b>TBP</b>   | 127         | Forward       | CCACTCACAGACTCTCACAAC   | 21            | 60        | 366-386         |
|              |             | Reverse       | CTGCGGTACAATCCCAGAACT   | 21            | 61.8      | 492-472         |

Supplemental Table 3. Patient Data for LuCaP TMA Samples

| <b>PDX</b>          | <b>Anatomic description</b> | <b>Source</b> | <b>Diagnosis</b>                                              | <b>Procedure</b>      | <b>AR Protein</b> |
|---------------------|-----------------------------|---------------|---------------------------------------------------------------|-----------------------|-------------------|
| <b>LuCaP 173.2A</b> | Metastatic                  | Rib           | DNPC                                                          | Autopsy               | -                 |
| <b>LuCaP 173.2B</b> | Metastatic                  | Rib           | DNPC                                                          | Autopsy               | -                 |
| <b>LuCaP 176</b>    | NA                          | NA            | ARLPC                                                         | Autopsy               | Low               |
| <b>LuCaP 173.1</b>  | Metastatic                  | Liver         | Metastatic adenocarcinoma with neuroendocrine differentiation | Autopsy               | -                 |
| <b>LuCaP 145.2</b>  | Metastatic                  | Lymph node    | Metastatic adenocarcinoma with neuroendocrine differentiation | Autopsy               | -                 |
| <b>LuCaP 145.1</b>  | Metastatic                  | Liver         | Metastatic adenocarcinoma with neuroendocrine differentiation | Autopsy               | -                 |
| <b>LuCaP 93</b>     | Primary                     | Prostate      | Adenocarcinoma with neuroendocrine differentiation            | Other                 | -                 |
| <b>LuCaP 35</b>     | Metastatic                  | Lymph node    | Metastatic adenocarcinoma                                     | Biopsy-Excisional     | +                 |
| <b>LuCaP 23.1</b>   | Metastatic                  | Lymph node    | Metastatic adenocarcinoma                                     | Autopsy               | +                 |
| <b>LuCaP 73</b>     | Primary                     | Prostate      | Adenocarcinoma                                                | Radical prostatectomy | +                 |
| <b>LuCaP 77</b>     | Metastatic                  | Bone          | Metastatic adenocarcinoma                                     | Autopsy               | +                 |
| <b>LuCaP 96CR</b>   | Primary                     | LuCaP 96      | Adenocarcinoma                                                | PDX                   | +                 |

PDX = patient-derived xenograft, AR = androgen receptor, NA = not available, DNPC = double negative prostate cancer, ARLPC = AR low prostate cancer.

Supplemental Table 4. Patient Data for Hormone-resistance TMA

| Participant ID | Case Type         | Surgery Type | Gleason Sum | Length PSA FU (months) | Vital Status | Survival in Years | AR Prot. |
|----------------|-------------------|--------------|-------------|------------------------|--------------|-------------------|----------|
| 1600           | Hormone Naïve     | TURP         | 9           | 23                     | Dead         | 1.92              | +        |
| 1623           | Hormone Naïve     | TURP         | 9           | 73                     | Dead         | 6.08              | +        |
| 1321           | Hormone Naïve     | TURP         | 9           | 11                     | Dead         | 1.92              | +        |
| 1625           | Hormone Naïve     | TURP         | 9           | 116                    | Dead         | 18.17             | +        |
| 1622           | Hormone Naïve     | TURP         | 9           | 18                     | Dead         | 2.84              | +        |
| 1659           | Hormone Naïve     | TURP         | 9           | 67                     | Dead         | 12.33             | +        |
| 1662           | Hormone Naïve     | TURP         | 9           | 3                      | Dead         | 0.25              | +        |
| 1411           | Hormone Resistant | TURP         | 9           | 11                     | Dead         | 0.92              | +        |
| 1414           | Hormone Resistant | TURP         | 9           | 59                     | Dead         | 4.92              | +        |
| 1415           | Hormone Resistant | TURP         | 9           | 0                      | Dead         | 13.83             | +        |
| 1548           | Hormone Resistant | TURP         | 10          | 3                      | Dead         | 0.25              | +        |
| 1550           | Hormone Resistant | TURP         | 9           | 11                     | Dead         | 0.92              | +        |
| 1553           | Hormone Resistant | TURP         | 9           | 26                     | Dead         | 2.17              | Low      |
| 1582           | Hormone Resistant | TURP         | 9           | 29                     | Dead         | 2.42              | +        |
| 1599           | Hormone Resistant | TURP         | 10          | 1                      | Dead         | 0.08              | +        |
| 1608           | Hormone Resistant | TURP         | 10          | 6                      | Dead         | 0.5               | Neg.     |
| 1609           | Hormone Resistant | TURP         | 9           | 5                      | Dead         | 0.42              | +        |
| 1630           | Hormone Resistant | TURP         | 9           | 4                      | Dead         | 0.33              | +        |
| 1636           | Hormone Resistant | TURP         | 8           | 7                      | Dead         | 0.58              | +        |
| 1638           | Hormone Resistant | TURP         | 9           |                        | Dead         | 5.51              | +        |
| 1660           | Hormone Resistant | TURP         | 9           | 1                      | Dead         | 0.08              | Low      |

TURP = transurethral resection of the prostate, PSA = prostate specific antigen, FU = follow-up, AR = androgen receptor, Neg.= negative



## SI References

1. Liu T, Ewald J, Ricke E, Bell R, Collins C, Ricke W. Modeling Human Prostate Cancer Progression in vitro. *Carcinogenesis*. 2018.
2. Vellky JE, Ricke EA, Huang W, Ricke WA. Expression and Localization of DDX3 in Prostate Cancer Progression and Metastasis. *The American Journal of Pathology*. 2019.
3. Hanna J, Leggett DS, Finley D. Ubiquitin depletion as a key mediator of toxicity by translational inhibitors. *Mol Cell Biol*. 2003;23(24):9251-9261.
4. Corey E, Quinn JE, Buhler KR, et al. LuCaP 35: a new model of prostate cancer progression to androgen independence. *The Prostate*. 2003;55(4):239-246.
5. Ellis WJ, Vessella RL, Buhler KR, et al. Characterization of a novel androgen-sensitive, prostate-specific antigen-producing prostatic carcinoma xenograft: LuCaP 23. *Clinical Cancer Research*. 1996;2(6):1039-1048.
6. Lam H-M, Nguyen HM, Labrecque MP, et al. Durable Response of Enzalutamide-resistant Prostate Cancer to Supraphysiological Testosterone Is Associated with a Multifaceted Growth Suppression and Impaired DNA Damage Response Transcriptomic Program in Patient-derived Xenografts. *European urology*. 2019.
7. Bluemn EG, Coleman IM, Lucas JM, et al. Androgen receptor pathway-independent prostate cancer is sustained through FGF signaling. *Cancer cell*. 2017;32(4):474-489. e476.
8. Navone NM, van Weerden WM, Vessella RL, et al. Movember GAP1 PDX project: An international collection of serially transplantable prostate cancer patient-derived xenograft (PDX) models. *The Prostate*. 2018;78(16):1262-1282.
9. Vellky JE, Ricke EA, Huang W, Ricke WA. Expression and Localization of DDX3 in Prostate Cancer Progression and Metastasis. *Am J Pathol*. 2019;189(6):1256-1267.
10. Vellky JE, Bauman TM, Ricke EA, Huang W, Ricke WA. Incidence of androgen receptor and androgen receptor variant 7 coexpression in prostate cancer. *The Prostate*. 2019.
11. Sehgal PD, Bauman TM, Nicholson TM, et al. Tissue-specific quantification and localization of androgen and estrogen receptors in prostate cancer. *Human pathology*. 2019;89:99-108.
12. Sehgal PD, Bauman TM, Nicholson TM, et al. Tissue-specific quantification and localization of androgen and estrogen receptors in prostate Cancer. *Human pathology*. 2019.
13. Nicholson TM, Sehgal PD, Drew SA, Huang W, Ricke WA. Sex steroid receptor expression and localization in benign prostatic hyperplasia varies with tissue compartment. *Differentiation*. 2013;85(4-5):140-149.
14. Bauman TM, Ricke EA, Drew SA, Huang W, Ricke WA. Quantitation of protein expression and co-localization using multiplexed immunohistochemical staining and multispectral imaging. *Journal of visualized experiments: JoVE*. 2016(110).
15. Bauman TM, Vezina CM, Ricke EA, et al. Expression and colocalization of  $\beta$ -catenin and lymphoid enhancing factor-1 in prostate cancer progression. *Human pathology*. 2016;51:124-133.
16. Barriga FM, Montagni E, Mana M, et al. Mex3a marks a slowly dividing subpopulation of Lgr5+ intestinal stem cells. *Cell stem cell*. 2017;20(6):801-816. e807.
17. Xie M, Vesuna F, Tantravedi S, et al. RK-33 radiosensitizes prostate cancer cells by blocking the RNA helicase DDX3. *Cancer research*. 2016;76(21):6340-6350.
18. Bol GM, Vesuna F, Xie M, et al. Targeting DDX3 with a small molecule inhibitor for lung cancer therapy. *EMBO molecular medicine*. 2015;7(5):648-669.

19. Kregel, S., et al. (2016). "Acquired resistance to the second-generation androgen receptor antagonist enzalutamide in castration-resistant prostate cancer." *Oncotarget* 7(18): 26259-26274.
